# Supplementary material for: Solotvynia, a New Coccoid Lineage among the Ulvophyceae (Chlorophyta)
Source: MDPI journal article supplement (doi:10.3390/microorganisms12050868), 2024-04-26
Supplement: s1 [file s1]

**Table S1:** GenBank entries (accession numbers) found by BLAST N search (100% coverage; 100% identity) using the V4 region of the SSU rDNA of each species. To each entry the geographical origin and after the habitat are given.

| species                          | strain         | accession | Habitat           | continent                         | coordinates                |
|----------------------------------|----------------|-----------|-------------------|-----------------------------------|----------------------------|
| <i>Desmochloris halophila</i>    | CCAP 6006/1    | FM882216  | marine            | North America (USA, MA)           | 41.392045 N, -70.620814 E  |
|                                  | CCAP 6006/4    | MW714125  | soil              | South America                     | -27.066667 N, -70.816667 E |
|                                  | RCC 2945       | KT860927  | marine            | Europe, North Sea                 | 54.000000 N, 0.000000 E    |
|                                  | SAG 2565       | MH703754  | soil              | West Europe                       | 54.416667 N, 13.366667 E   |
|                                  | SAG 2397       | MW714126  | freshwater        | West Europe                       | 49.385833 N, 11.471944 E   |
| <i>Desmochloris edaphica</i>     | CCAP 6006/5    | MW714127  | soil              | East Europe                       | 45.254722 N, 30.203333 E   |
|                                  | CCAP 6006/6    | MW714128  | soil              | South America                     | -27.066667 N, -70.816667 E |
|                                  | TT-4-1         | MT968399  | soil, saline      | West Europe                       | 51.467324 N, 11.770714 E   |
|                                  | ACSSI 181      | MH102328  | soil              | East Europe                       | 47.889167 N, 44.013889 E   |
|                                  | ACSSI 180      | KY086483  | soil              | East Europe                       | 47.889167 N, 44.013889 E   |
| <i>Desmochloris mollenhaueri</i> | CCAP 6006/2    | FM882217  | soil              | Africa                            | -31.616667 N, 18.716667 E  |
|                                  | CCAP 6006/3    | FM882218  | soil              | Africa                            | -28.612340 N, 16.654331 E  |
|                                  | CCAP 6006/7    | MW714129  | soil              | Africa                            | -28.226646 N, 17.025668 E  |
|                                  | CCAP 6006/8    | MW714130  | soil              | South America                     | -27.066667 N, -70.816667 E |
|                                  | CCAP 6006/9    | MW714131  | soil              | South America                     | -27.066667 N, -70.816667 E |
|                                  | JB13           | KF791549  | soil saline       | Asia China                        | 46.585352 N, 125.161214 E  |
| <i>Chlorocystis cohnii</i>       | SAG 9.90       | MW714132  | marine            | West Europe                       | 54.182061 N, 7.887631 E    |
|                                  | SCCAP K-0421   | MW714133  | marine, endophyte | North America, Greenland          | 64.434722 N, -50.269444 E  |
| <i>Chlorocystis dangeardii</i>   | SAG 8.86       | MW714140  | marine            | West Europe                       | 53.277121 N, -3.807850 E   |
|                                  | CCAP 211/25    | MW714141  | brackish          | West Europe                       | 50.358333 N, -4.166667 E   |
|                                  | CCAP 233/1     | MW714142  | marine            | West Europe                       | 45.513149 N, -1.122879 E   |
| <i>Chlorocystis john-westii</i>  | CCAP 6005/4    | MW714146  | marine, endophyte | South America                     | -23.693247 N, -45.461417 E |
|                                  | CCAP 6005/5    | MW714147  | marine, endophyte | Australia                         | -23.853814 N, 151.278133 E |
|                                  | CCAP 6005/10   | MW714143  | marine, endophyte | South America                     | -3.558611 N, -80.519142 E  |
|                                  | CCAP 6005/11   | MW714144  | marine, endophyte | Australia                         | -19.418678 N, 147.233276 E |
|                                  | CCAP 6005/12   | MW714145  | marine, endophyte | Australia                         | -19.418678 N, 147.233276 E |
|                                  | UTEX 2846      | MW714148  | marine, endophyte | South America                     | -5.208550 N, -45.393026 E  |
|                                  | NIES-1838      | PP477768  | marine            | Asia                              | 35.649862 N, 139.825201 E  |
|                                  | NIES-1839      | PP477769  | marine            | Asia                              | 35.649862 N, 139.825201 E  |
|                                  | CCAP 6005/13   | MK541803  | marine            | Africa                            | -20.736302 N, 44.002005 E  |
|                                  | MBIC 10446     | AB058345  | marine            | Asia                              | 26.570775 N, 128.02559 E   |
| <i>Chlorocystis operculatum</i>  | SAG 19.92      | MW714134  | marine            | West Europe                       | 45.513149 N, -1.122879 E   |
|                                  | CCMP 435       | MW714135  | marine            | West Europe                       | 45.513149 N, -1.122879 E   |
|                                  | SAG 11.90      | MW714136  | marine            | West Europe                       | 54.182061 N, 7.887631 E    |
| <i>Chlorocystis dilatatum</i>    | SAG 12.90      | MW714139  | marine            | West Europe                       | 54.182061 N, 7.887631 E    |
| <i>Chlorocystis moorei</i>       | CCAP 6005/6    | MW714137  | marine            | West Europe                       | 54.182061 N, 7.887631 E    |
|                                  | CCMP 2288      | MW714138  | marine            | North America (USA, Washington)   | 48.535278 N, -123.031111 E |
|                                  | TT-4-1-D       | MT968404  | soil, saline      | West Europe                       | 51.467324 N, 11.770714 E   |
|                                  | TT-4-1-O       | MT968406  | soil, saline      | West Europe                       | 51.467324 N, 11.770714 E   |
|                                  | TT-4-1-M       | MT968405  | soil, saline      | West Europe                       | 51.467324 N, 11.770714 E   |
|                                  | NN-4-1-T       | MT968403  | soil, saline      | West Europe                       | 51.467324 N, 11.770714 E   |
|                                  | NN-4-1-S       | MT968402  | soil, saline      | West Europe                       | 51.467324 N, 11.770714 E   |
|                                  | NN-4-1-Q       | MT968401  | soil, saline      | West Europe                       | 51.467324 N, 11.770714 E   |
|                                  | voucher        | DQ821520  | marine            | North America (USA, California)   | 38.755113 N, -121.353309 E |
| <i>Sykidion marinum</i>          | UTEX 1445      | MW714149  | unknown           | unknown                           | unknown                    |
| <i>Sykidion dyeri</i>            | CCMP 257       | MW714150  | marine            | North America (USA, CT)           | 41.216667 N, -73.066667 E  |
|                                  | BE-001         | MK457458  | marine            | South America (Brasil)            | -22.892939 N, -43.124084 E |
| <i>Sykidion droebakense</i>      | CCMP 258       | MW714151  | marine            | North America (British Columbia)  | 48.407326 N, -123.980713 E |
|                                  | CCMP 438       | MW714152  | marine            | Antarctica                        | -64.774167 N, -64.052222 E |
|                                  | NKY372003      | LC505539  | marine            | Asia                              | 30.347925 N, 130.524483 E  |
| <i>Solotvynia ucrainica</i>      | SAG 2662       | PP477766  | saline            | West Europe                       | 47.955556 N, 23.871111 E   |
|                                  | MBIC 10461     | AB058346  | marine            | Asia                              | 26.546766 N, 128.055267 E  |
| <i>Symbiochlorum hainanensis</i> | CCMP 1293      | PP477767  | marine            | Asia                              | 7.540278 N, 134.589167 E   |
|                                  | CCTCC M2018096 | MH061387  | marine            | Asia                              | 18.208480 N, 109.401855 E  |
| <i>Ignatius tetrasporus</i>      | UTEX 2012      | FN562432  | soil              | North America (USA, Pennsylvania) | 41.396201 N, -75.196287 E  |
