# Supplementary material for: Solotvynia, a New Coccoid Lineage among the Ulvophyceae (Chlorophyta)
Source: MDPI journal article supplement (doi:10.3390/microorganisms12050868), 2024-04-26
Supplement: s1 [file s1]

**Table S2:** Distribution of the investigated coccoid and sarcinoid genera found in the GBIF database (<https://www.gbif.org>)

| Genus                                                  | # of records | Sources                                                                                                |
|--------------------------------------------------------|--------------|--------------------------------------------------------------------------------------------------------|
| <i>Desmochloris</i>                                    | 484          | <a href="https://www.gbif.org/species/2652025">https://www.gbif.org/species/2652025</a>                |
| <i>Chlorocystis</i><br>(syn. <i>Halochlorococcum</i> ) | 52           | <a href="https://www.gbif.org/species/2646192">https://www.gbif.org/species/2646192</a>                |
|                                                        | 311          | <a href="https://www.gbif.org/species/9798860">https://www.gbif.org/species/9798860</a>                |
| <i>Solotvynia</i>                                      | 2            | this study                                                                                             |
| <i>Sykidion</i><br>(syn. <i>Pseudoneochloris</i> )     | 25           | <a href="https://www.gbif.org/species/2642314">https://www.gbif.org/species/2642314</a>                |
|                                                        | 77           | <a href="https://www.gbif.org/species/2646252">https://www.gbif.org/species/2646252</a>                |
| <i>Ignatius</i>                                        | 75           | <a href="https://www.gbif.org/species/2640526">https://www.gbif.org/species/2640526</a>                |
| <i>Symbiochlorum</i>                                   | 2            | <a href="https://www.gbif.org/species/10620661">https://www.gbif.org/species/10620661</a> , this study |
| <b>Total</b>                                           | <b>1028</b>  |                                                                                                        |
